# Supplementary material
Source: PubMed Central journal article supplement (PMC5602903)
Supplement: supp_fj.201700346R_Supplemental_Figure.pdf [file supp_fj.201700346R_Supplemental_Figure.pdf]

**Fig.S1**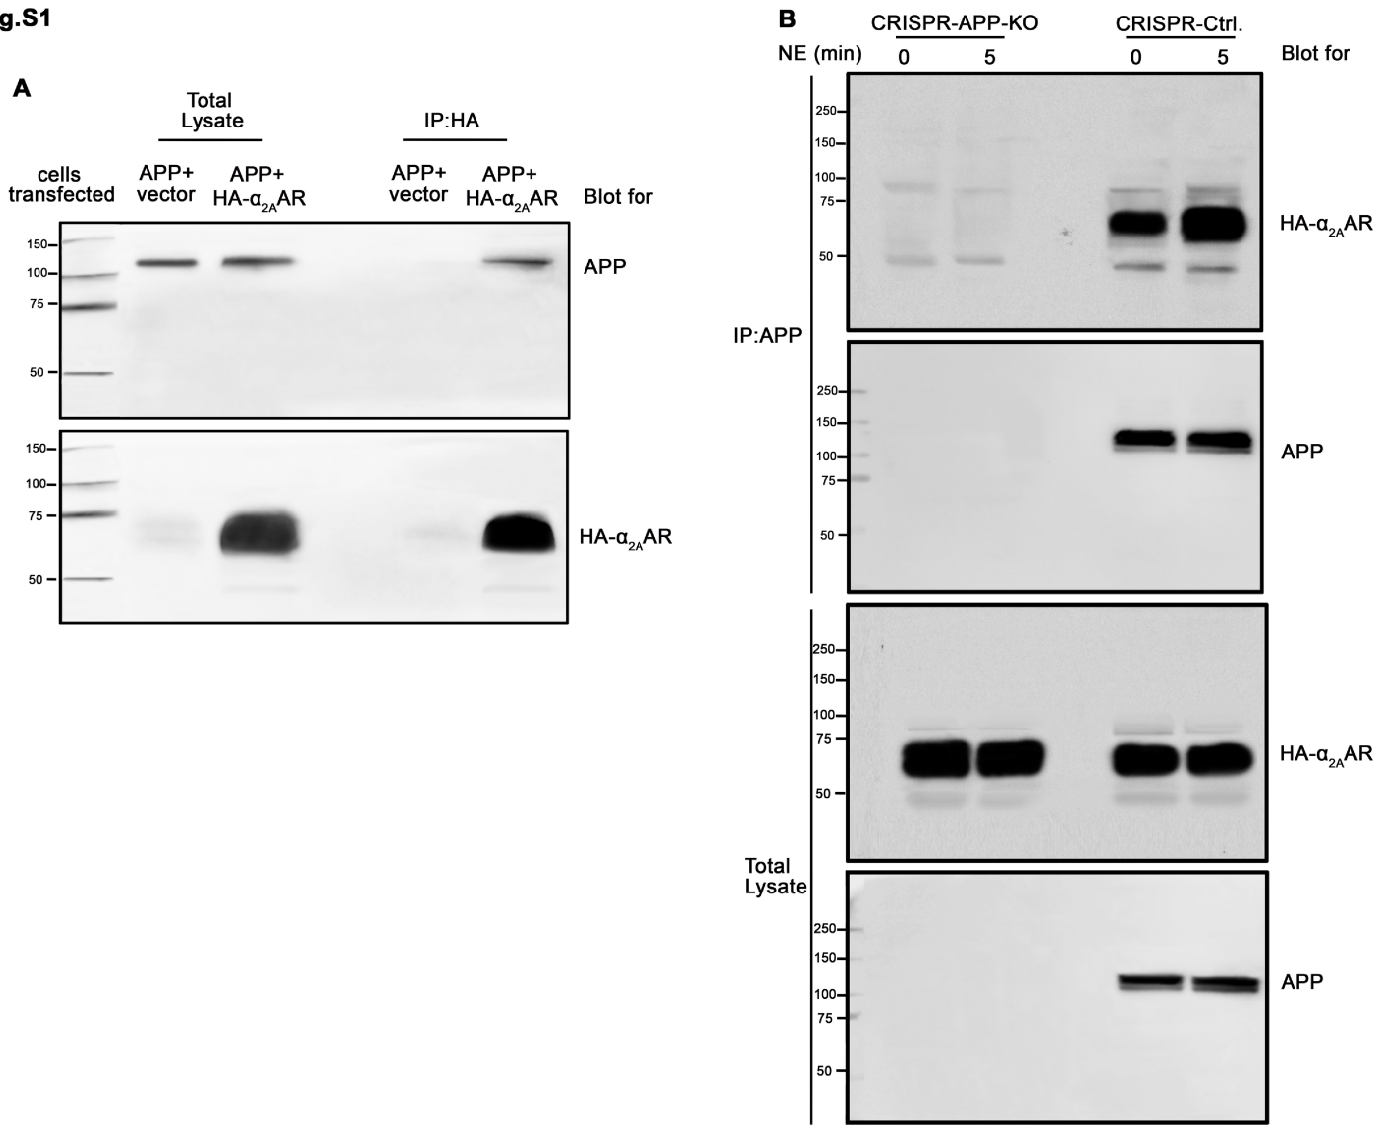

**Figure S1:** Complex formation between APP and  $\alpha_{2A}$ AR in cells. (A) Lysates from HEK293 cells co-expressing APP with or without HA- $\alpha_{2A}$ AR were subjected to co-IP assays using anti-HA affinity matrix. Representative Western blots of the full gel are shown. (B) Control or APPKO N2a cells expressing HA- $\alpha_{2A}$ AR were stimulated with vehicle or 10  $\mu$ M NE (plus 1  $\mu$ M prazosin and 1  $\mu$ M propranolol) for 5 min. Cell lysates were subjected to co-IP assays using an anti-APP antibody. Representative Western blots including the full gel are shown.
